# Supplementary material for: Oxygen vacancy regulated selective hydrogenation of α,β-unsaturated aldehydes over LDH surface group coordinated transition metal photocatalysts
Source: Royal Society of Chemistry journal article supplement (doi:10.1039/d2cy01298g), 2022-01-01
Supplement: d2cy01298g1.pdf [file d2cy01298g1.pdf]

## Supporting Information for

# Oxygen Vacancies Regulated Selective Hydrogenation of $\alpha,\beta$ -unsaturated Aldehydes over LDH Surface Group Coordinated Transition Metal Photocatalysts

Jin Zhang, ‡<sup>a, b</sup> Mengting Gao, ‡<sup>a, b</sup> Ruiyi Wang, \*<sup>a</sup> Xincheng Li, <sup>a, b</sup> Pengqi Zhu, <sup>c, d</sup> Yunwei Wang, \*<sup>a</sup> and Zhanfeng Zheng \*<sup>a</sup>

<sup>a</sup> *State Key Laboratory of Coal Conversion, Institute of Coal Chemistry, Chinese Academy of Sciences, Taiyuan, 030001, China. E-mail: zfzheng@sxicc.ac.cn,*

<sup>b</sup> *Center of Materials Science and Optoelectronics Engineering, University of Chinese Academy of Sciences, Beijing, 100049, China*

<sup>c</sup> *Shanxi Bethune Hospital, Shanxi Academy of Medical Sciences, Tongji Shanxi Hospital, Third Hospital of Shanxi Medical University, Taiyuan 030032, China*

<sup>d</sup> *Tongji Hospital, Tongji Medical College, Huazhong University of Science and Technology, Wuhan 430030, China*

‡ *These authors contributed equally to this work.*

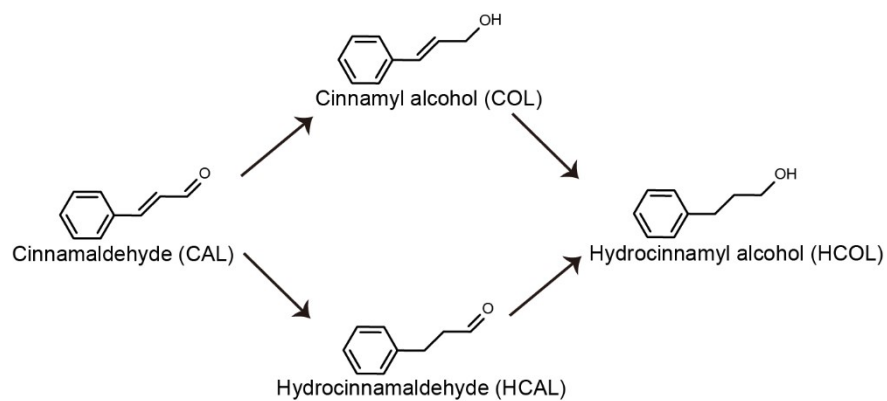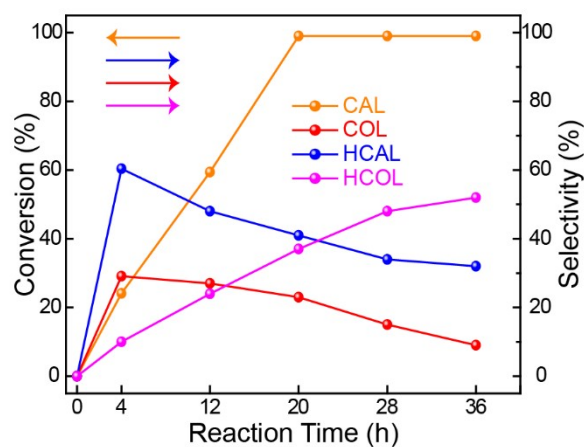

**Fig. S1** Time-conversion plots for cinnamaldehyde reduction under visible light irradiation catalyzed by Ru/LDH catalyst.

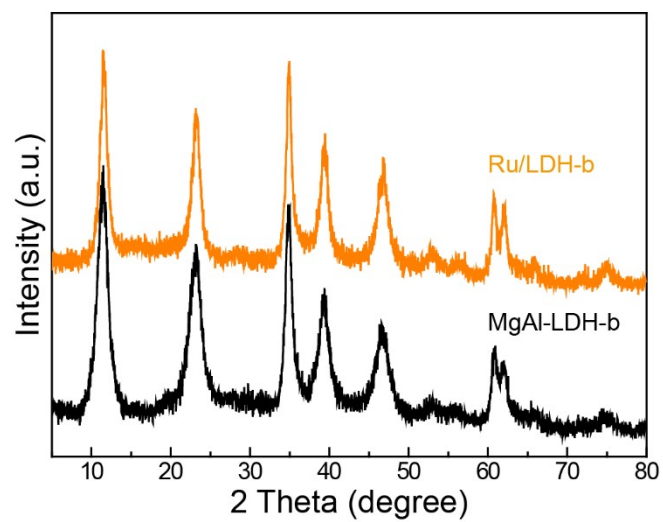

**Fig. S2** XRD patterns of LDH-b and Ru/LDH-b.

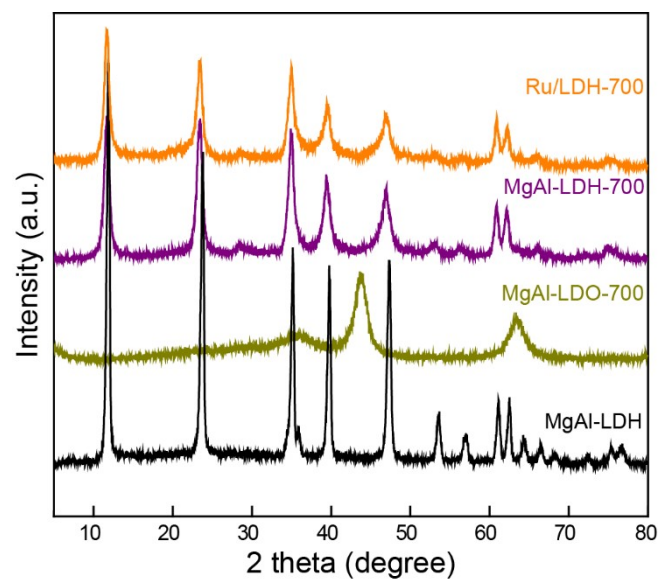

**Fig. S3** The XRD patterns of various samples.

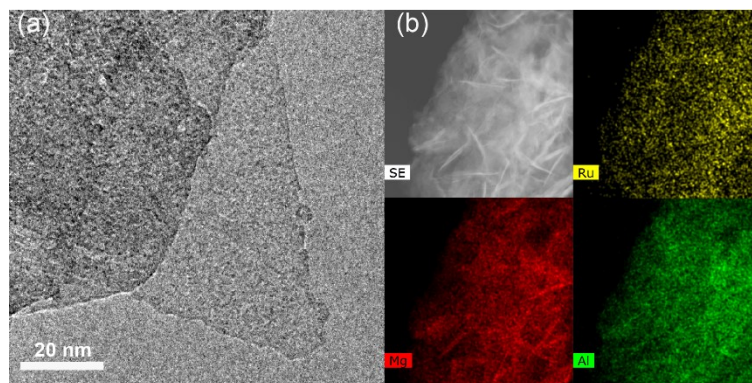

**Fig. S4** (a) TEM image and (b) EDX mappings of Ru/LDH-700 catalyst.

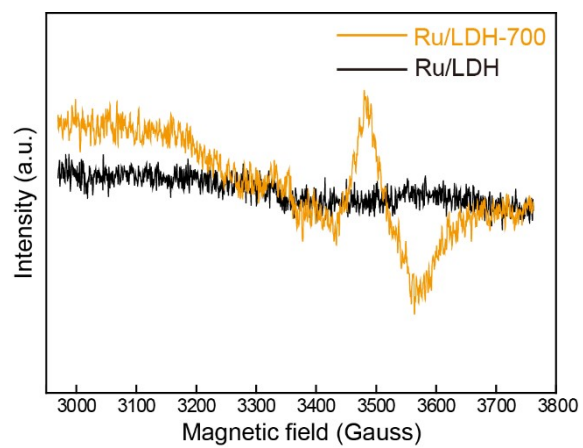

**Fig. S5** EPR patterns of Ru/LDH and Ru/LDH-700 catalysts.

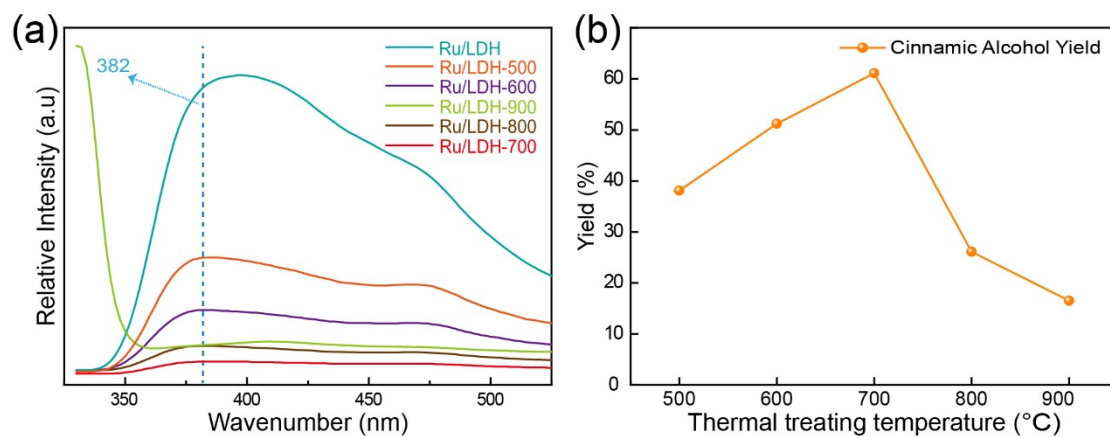

**Fig. S6** (a) The PL spectra and (b) Effect of calcination temperatures on the yield of cinnamyl alcohol.

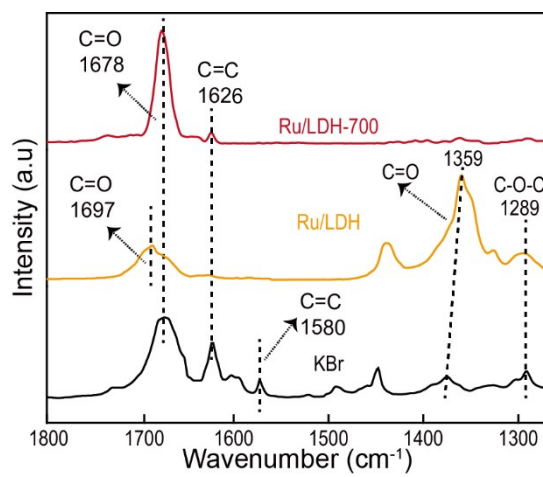

**Fig. S7** DRIFTS of cinnamaldehyde adsorbed on KBr, Ru/LDH and Ru/LDH-700.



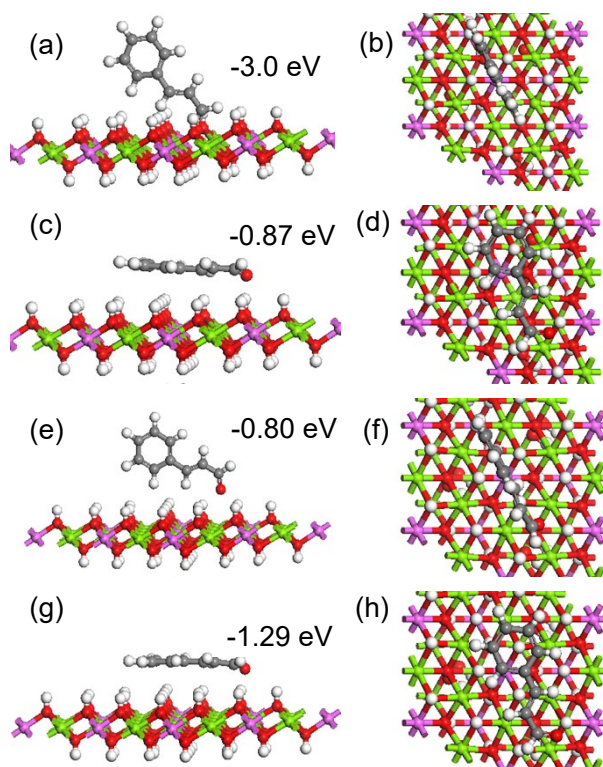

**Fig. S8** The optimized structure for adsorption of cinnamaldehyde molecule using  $\text{C}=\text{O}$  (a, b) or  $\text{-C}=\text{C}$  group (c, d) on MgAl-LDH-700. The optimized structure for adsorption of cinnamaldehyde molecule using  $\text{C}=\text{O}$  (e, f) or  $\text{-C}=\text{C}$  group (g, h) on MgAl-LDH catalyst. Atom coloring: Mg, purple; Al, green; O, red; H, white; C, black.

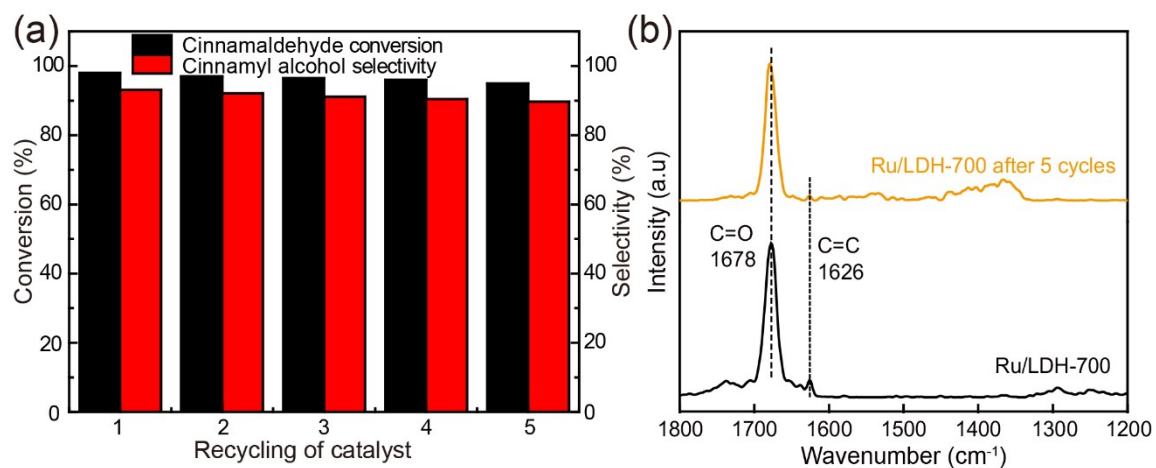

**Fig. S9** (a) Recyclability in selective hydrogenation of cinnamaldehyde over Ru/LDH-700 catalyst and (b) DRIFTS of cinnamaldehyde adsorbed on fresh and used Ru/LDH-700 photocatalyst.

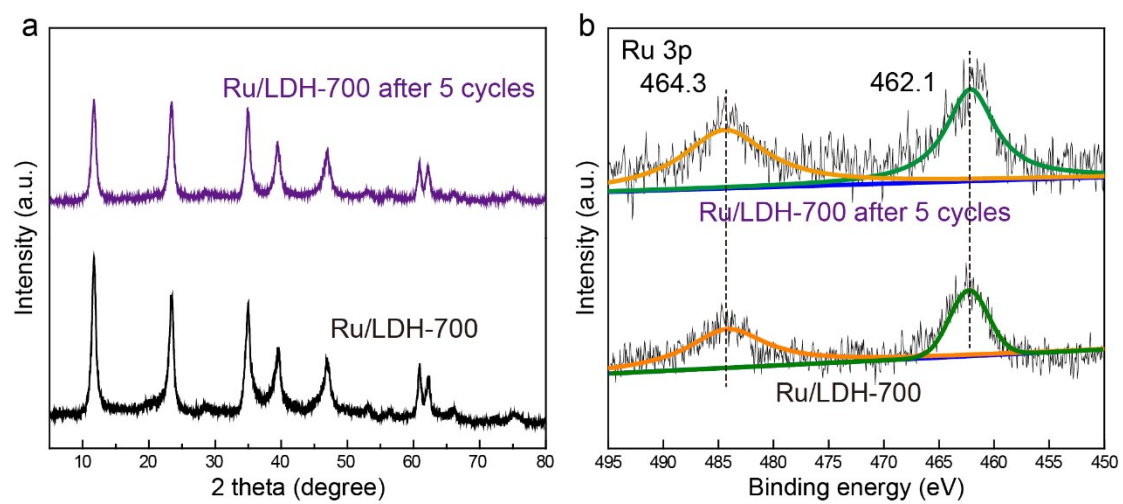

**Fig. S10** (a) XRD patterns and (b) XPS spectra of the fresh and used Ru/LDH-700 photocatalyst.

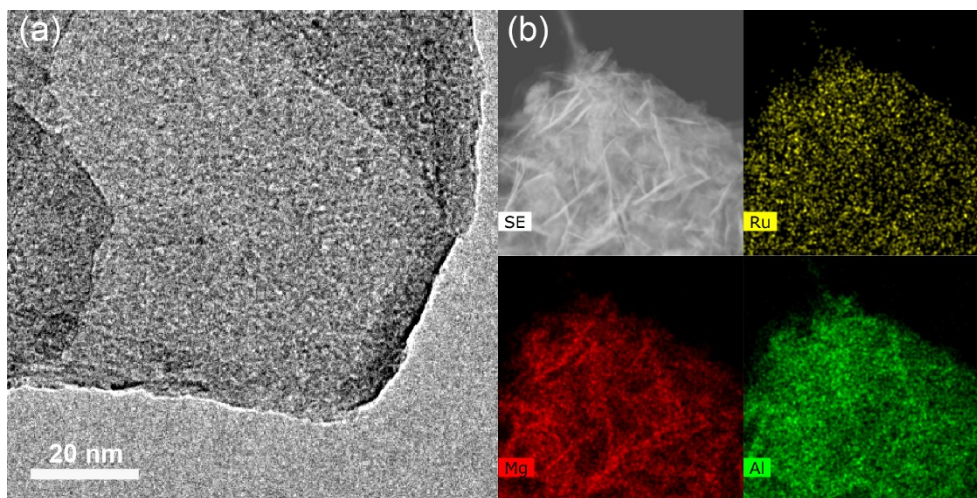

**Fig. S11** TEM image (a) and EDX mappings (b) of Ru/LDH-700 photocatalyst used for five cycles.

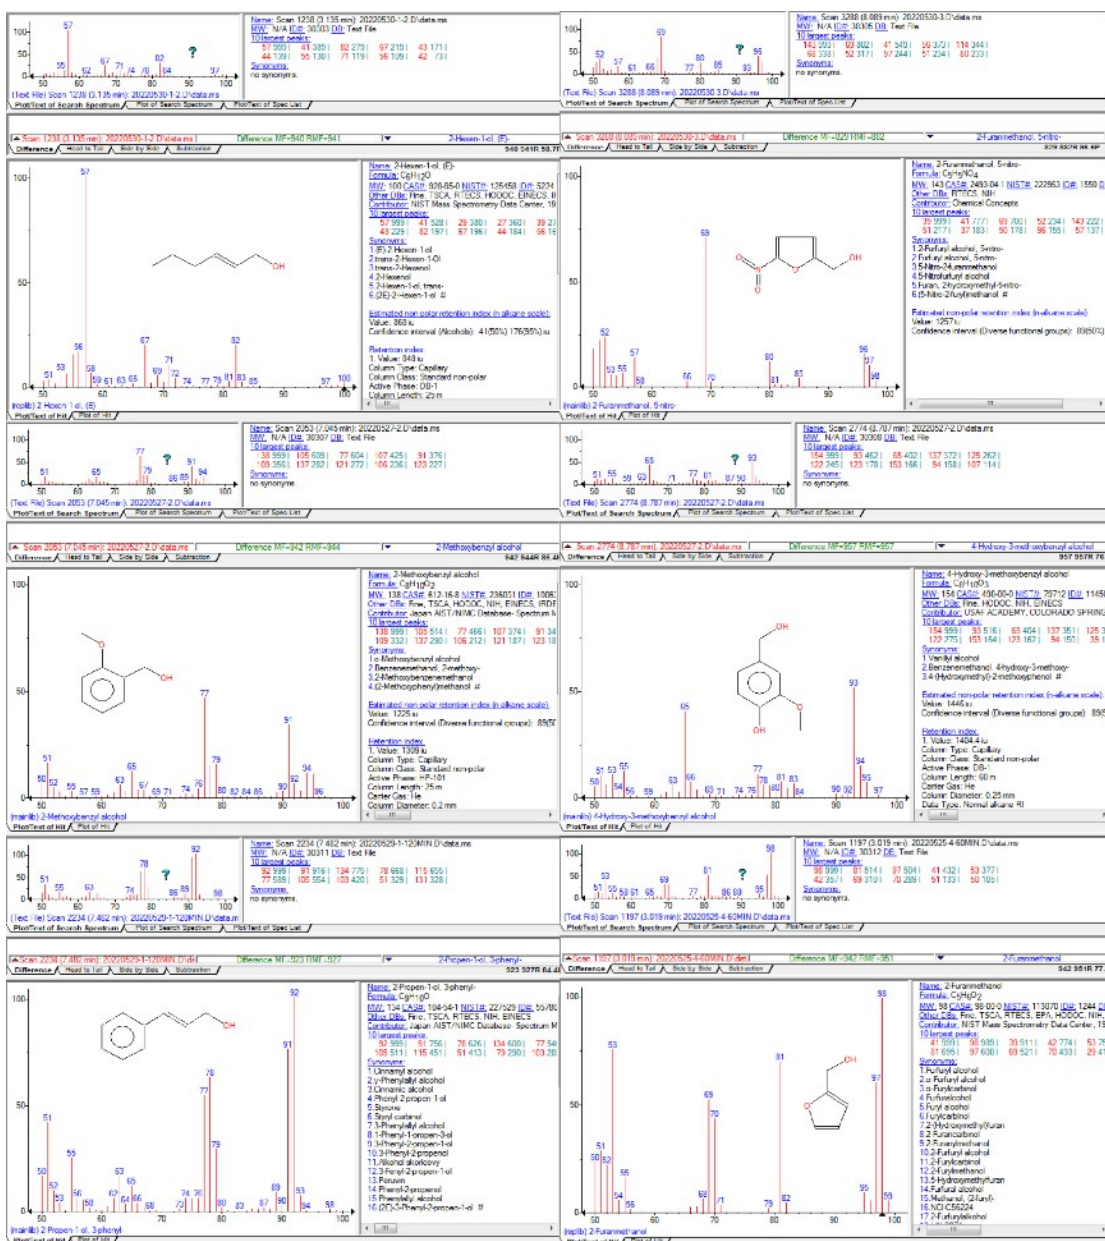

Fig. S12 Mass spectrometry data of various reaction products.

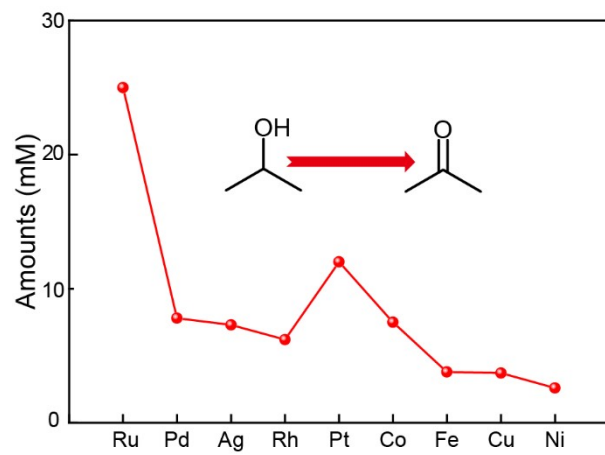

**Fig. S13** Comparison of isopropanol activation ability of various catalysts.

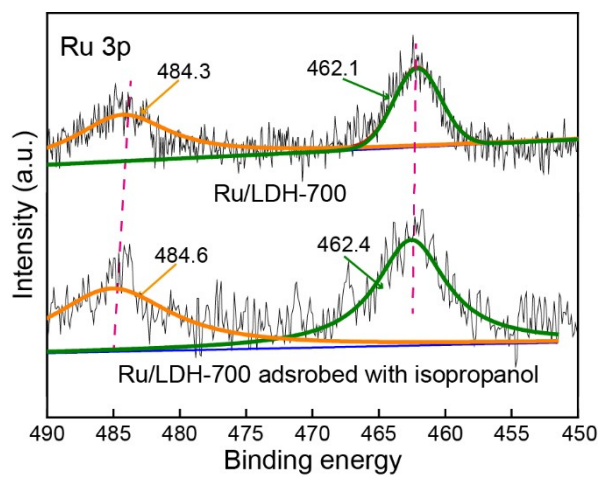

**Fig. S14** Ru 3p XPS spectra of Ru/LDH-700 and Ru/LDH-700 after isopropyl alcohol adsorption.

**Table S1** Effect of Ru loadings on the cinnamaldehyde hydrogenation<sup>a</sup>

| Entry | Sample             | Ru loading (wt%) <sup>b</sup> | Incident light | Conv. (%) | Sel. (%) |
|-------|--------------------|-------------------------------|----------------|-----------|----------|
| 1     | LDH-700            | 0                             | Visible        | 2.4       | 91.6     |
| 2     | LDH-700            | 0                             | Dark           | 1.2       | 92.8     |
| 3     | 1.9 wt% Ru/LDH-700 | 1.9                           | Visible        | 4.7       | 91.4     |
| 4     | 1.9 wt% Ru/LDH-700 | 1.9                           | Dark           | 1.6       | 92.1     |
| 5     | 3.2 wt% Ru/LDH-700 | 3.2                           | Visible        | 43.7      | 91.9     |
| 6     | 3.2 wt% Ru/LDH-700 | 3.2                           | Dark           | 17.6      | 92.7     |
| 7     | 4.3 wt% Ru/LDH-700 | 4.3                           | Visible        | 67.1      | 91.6     |
| 8     | 4.3 wt% Ru/LDH-700 | 4.3                           | Dark           | 24.3      | 93.4     |
| 9     | 6.2 wt% Ru/LDH-700 | 6.2                           | Visible        | 71.5      | 90.7     |
| 10    | 6.2 wt% Ru/LDH-700 | 6.2                           | Dark           | 36.4      | 92.1     |

<sup>a</sup> Reaction conditions: 0.1 mmol reactant, 2 mL isopropyl alcohol, 80 °C, 20 mg catalyst, 4 h, Xe lamp irradiation (420–800 nm, 500 mW cm<sup>-2</sup>), 1 atm Ar.

<sup>b</sup> Determined by inductively coupled plasma (ICP) analysis.



**Table S2** Effect of catalyst usage on the cinnamaldehyde hydrogenation

| Entry | catalyst amount (mg) | Incident light | Conversion (%) | Selectivity (%) |
|-------|----------------------|----------------|----------------|-----------------|
| 1     | 10                   | Visible        | 4.5            | 91.5            |
| 2     | 10                   | Dark           | 1.3            | 92.4            |
| 3     | 15                   | Visible        | 39.7           | 93.4            |
| 4     | 15                   | Dark           | 12.6           | 92.7            |
| 5     | 20                   | Visible        | 67.1           | 91.6            |
| 6     | 20                   | Dark           | 24.3           | 93.4            |
| 7     | 30                   | Visible        | 88.4           | 91.4            |
| 8     | 30                   | Dark           | 42.7           | 93.1            |

Reaction conditions: catalyst 4.3 wt% Ru/LDH-700, cinnamaldehyde 0.1 mmol, isopropyl alcohol 2 mL, 80 °C, 4 h, Xe lamp irradiation (420–800 nm, 500 mW cm<sup>-2</sup>), 1 atm Ar.

**Table S3** Effect of cinnamaldehyde concentration

| Entry | Cinnamaldehyde concentration (mol L <sup>-1</sup> ) | Incident light | Conversion (%) | Selectivity (%) |
|-------|-----------------------------------------------------|----------------|----------------|-----------------|
| 1     | 0.025                                               | Visible        | 99.9           | 93.1            |
| 2     | 0.025                                               | Dark           | 66.1           | 93.9            |
| 3     | 0.05                                                | Visible        | 67.1           | 91.6            |
| 4     | 0.05                                                | Dark           | 24.3           | 93.4            |
| 5     | 0.75                                                | Visible        | 52.5           | 91.1            |
| 6     | 0.75                                                | Dark           | 20.8           | 92.5            |
| 7     | 0.1                                                 | Visible        | 39.1           | 90.7            |
| 8     | 0.1                                                 | Dark           | 17.4           | 91.4            |

Reaction conditions: 20 mg 4.3 wt% Ru/LDH-700, 2 mL isopropyl alcohol, 80 °C, 4 h,

Xe lamp irradiation (420–800 nm, 500 mW cm<sup>-2</sup>), 1 atm Ar.

**Table S4** Influence of reaction temperature

| Entry | T (°C) | Incident<br>light | Conv.<br>(%) | Sel.<br>(%) |
|-------|--------|-------------------|--------------|-------------|
| 1     | 60     | Visible           | 7.2          | 94.2        |
| 2     | 60     | Dark              | 1.8          | 93.5        |
| 3     | 80     | Visible           | 38.4         | 91.9        |
| 4     | 80     | Dark              | 13.1         | 93.6        |
| 5     | 100    | Visible           | 97.5         | 91.1        |
| 6     | 100    | Dark              | 51.8         | 92.5        |

Reaction conditions: 0.1 mmol reactant, 2 mL isopropyl alcohol, 20 mg 4.3 wt%

Ru/LDH-700, 2 h, Xe lamp irradiation (420–800 nm, 500 mW cm<sup>-2</sup>), 1 atm Ar.

**Table S5** Textural properties of various samples.

| Entry | Catalyst     | BET surface<br>area<br>(m <sup>2</sup> g <sup>-1</sup> ) | Pore volume<br>(cm <sup>3</sup> g <sup>-1</sup> ) | Pore size<br>(nm) |
|-------|--------------|----------------------------------------------------------|---------------------------------------------------|-------------------|
| 1     | MgAl-LDH     | 23.86                                                    | 0.071                                             | 12.56             |
| 2     | Ru/LDH       | 21.37                                                    | 0.073                                             | 10.67             |
| 3     | MgAl-LDH-700 | 91.51                                                    | 0.50                                              | 20.77             |
| 4     | Ru/LDH-700   | 84.77                                                    | 0.43                                              | 19.17             |
| 5     | MgAl-LDH-b   | 106.31                                                   | 0.58                                              | 25.34             |
| 6     | Ru/LDH-b     | 97.46                                                    | 0.51                                              | 23.97             |

**Table S6** Catalytic performance of Ru/LDH-b for cinnamaldehyde reduction

| Entry | Catalyst         | Incident light | Conv.<br>(%) | Sel.<br>(%) |
|-------|------------------|----------------|--------------|-------------|
| 1     | 4.3 wt% Ru/LDH-b | Visible        | 17.2         | 28.7        |
| 2     | 4.0 wt% Ru/LDH-b | Dark           | 8.1          | 31.4        |

Reaction conditions: 0.1 mmol reactant, 2 mL isopropyl alcohol, 80 °C, 20 mg catalyst, 4 h, Xe lamp irradiation (420–800 nm, 500 mW cm<sup>-2</sup>), 1 atm Ar.

## Isotope labeling experiments

Reaction conditions: cinnamaldehyde 0.1 mmol, Ru/LDH-700 20 mg, 2-propanol-OD 2 mL, Ar 1 atm, 80 °C, 6 h, Xe lamp irradiation (420–800 nm, 500 mW cm<sup>-2</sup>). The product was determined by <sup>1</sup>H NMR and <sup>13</sup>C NMR. The position of deuterium was confirmed by comparing the <sup>1</sup>H NMR, and <sup>13</sup>C NMR of cinnamic alcohol standard sample and the product.

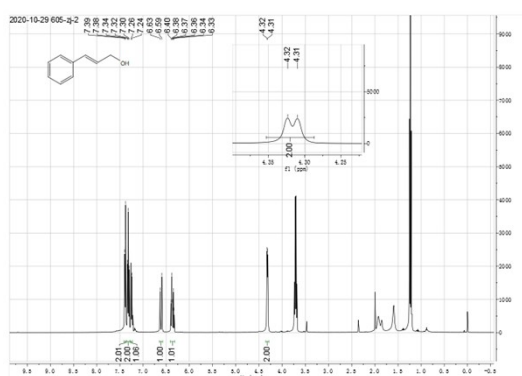

**Product of isotope labeling experiments:** <sup>1</sup>H NMR (400 MHz, CDCl<sub>3</sub>, TMS): δ 7.38 (d, J = 4.0 Hz, 2H), 7.32 (t, J = 16.0 Hz, 2H), 7.25 (d, J = 24.0 Hz, 1H), 6.61 (d, J = 16.0 Hz, 1H), 6.36 (dt, J = 16.0 & 8 Hz, 1H), 4.31 (d, J = 4.0 Hz, 2H).

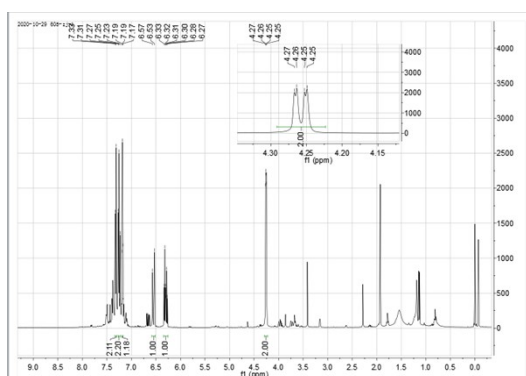

**Cinnamic alcohol standard sample:** <sup>1</sup>H NMR (400 MHz, CDCl<sub>3</sub>, TMS): δ 7.32 (d, J = 8.0 Hz, 2H), 7.25 (t, J = 8.0 Hz, 2H), 7.18 (d, J = 8.0 Hz, 1H), 6.55 (d, J = 16.0 Hz, 1H), 6.36 (dt, J = 16.0 & 4 Hz, 1H), 4.26 (dd, J = 8.0 & 4.0 Hz, 2H).
